# Supplementary material
Source: publisher site journal article supplement (https://www.dovepress.com/article/316664)
Supplement: Supplementary file 1 [file get_supplementary_file.php]

## Appendix 1: Questionnaire

Responses: 1=Strongly Disagree; 2=Disagree; 3=Little Disagree; 4=Neutral; 5=Little Agree; 6=Agree; 7=Strongly Agree

### PART-2: Emotional Intelligence

| Sr. No.                                 | Statements                                                              | Strongly Disagree | Disagree | Little Disagree | Neutral | Little Agree | Agree | Strongly Agree |
|-----------------------------------------|-------------------------------------------------------------------------|-------------------|----------|-----------------|---------|--------------|-------|----------------|
| <b>Self-Awareness</b>                   |                                                                         |                   |          |                 |         |              |       |                |
| SA1                                     | I am able to identify my emotions in different situations.              | 1                 | 2        | 3               | 4       | 5            | 6     | 7              |
| SA2                                     | I believe that emotions play an essential role in everyday life events. | 1                 | 2        | 3               | 4       | 5            | 6     | 7              |
| SA3                                     | I believe that my moods impact the people around me.                    | 1                 | 2        | 3               | 4       | 5            | 6     | 7              |
| SA4                                     | I find it easy to express how others feel in different scenarios.       | 1                 | 2        | 3               | 4       | 5            | 6     | 7              |
| <b>Self-Regulation</b>                  |                                                                         |                   |          |                 |         |              |       |                |
| M1                                      | I can talk to someone if I am very upset.                               | 1                 | 2        | 3               | 4       | 5            | 6     | 7              |
| M2                                      | I am able to control my overthinking.                                   | 1                 | 2        | 3               | 4       | 5            | 6     | 7              |
| M3                                      | I am able to analyze my thoughts.                                       | 1                 | 2        | 3               | 4       | 5            | 6     | 7              |
| M4                                      | I concentrate on a pleasant activity when I am feeling low.             | 1                 | 2        | 3               | 4       | 5            | 6     | 7              |
| <b>Motivation</b>                       |                                                                         |                   |          |                 |         |              |       |                |
| M1                                      | I accept responsibility for my reactions                                | 1                 | 2        | 3               | 4       | 5            | 6     | 7              |
| M2                                      | I can contain myself in anger-provoking situations.                     | 1                 | 2        | 3               | 4       | 5            | 6     | 7              |
| M3                                      | I direct my negative energy into doing something productive.            | 1                 | 2        | 3               | 4       | 5            | 6     | 7              |
| <b>Social Skills</b>                    |                                                                         |                   |          |                 |         |              |       |                |
| SS1                                     | I find it easy to share my feelings with others.                        | 1                 | 2        | 3               | 4       | 5            | 6     | 7              |
| SS2                                     | I am good at motivating others.                                         | 1                 | 2        | 3               | 4       | 5            | 6     | 7              |
| SS3                                     | It is easy for me to make friends.                                      | 1                 | 2        | 3               | 4       | 5            | 6     | 7              |
| SS5                                     | Others can depend on me.                                                | 1                 | 2        | 3               | 4       | 5            | 6     | 7              |
| <b>Academic Social Networking Sites</b> |                                                                         |                   |          |                 |         |              |       |                |
| ASNS1                                   | I engage in academic discussions on social media                        | 1                 | 2        | 3               | 4       | 5            | 6     | 7              |
| ASNS2                                   | I use social media to disseminate knowledge to my classmates.           | 1                 | 2        | 3               | 4       | 5            | 6     | 7              |

|       |                                                                                                                                                    |   |   |   |   |   |   |   |
|-------|----------------------------------------------------------------------------------------------------------------------------------------------------|---|---|---|---|---|---|---|
| ASNS3 | Engaging in academic forums on social media to understand the concepts clearly.                                                                    | 1 | 2 | 3 | 4 | 5 | 6 | 7 |
| ASNS4 | The usage of internet browsing for research has helped improve my grades.                                                                          | 1 | 2 | 3 | 4 | 5 | 6 | 7 |
| ASNS5 | The use of online applications in class is helpful.                                                                                                | 1 | 2 | 3 | 4 | 5 | 6 | 7 |
| ASNS6 | Using email or other electronic means (such as WhatsApp, WeChat, Facebook, etc.) to share content with other students and teachers is very useful. | 1 | 2 | 3 | 4 | 5 | 6 | 7 |
| ASNS7 | The e-learning platform (e.g. Moodle) is very useful to me.                                                                                        | 1 | 2 | 3 | 4 | 5 | 6 | 7 |
| ASNS8 | I regularly use online discussion groups related to my study.                                                                                      | 1 | 2 | 3 | 4 | 5 | 6 | 7 |

### **Academic Performance**

|      |                                                          |   |   |   |   |   |   |   |
|------|----------------------------------------------------------|---|---|---|---|---|---|---|
| AP1  | I am dealing with unfamiliar problems.                   | 1 | 2 | 3 | 4 | 5 | 6 | 7 |
| AP2  | I can think creatively.                                  | 1 | 2 | 3 | 4 | 5 | 6 | 7 |
| AP3  | I can think analytically and critically.                 | 1 | 2 | 3 | 4 | 5 | 6 | 7 |
| AP4  | I can views things from a global perspective.            | 1 | 2 | 3 | 4 | 5 | 6 | 7 |
| AP5  | I am developing in-depth knowledge in my areas of study. | 1 | 2 | 3 | 4 | 5 | 6 | 7 |
| AP6  | I can communicate effectively with others.               | 1 | 2 | 3 | 4 | 5 | 6 | 7 |
| AP8  | I have leadership skills.                                | 1 | 2 | 3 | 4 | 5 | 6 | 7 |
| AP9  | I can manage my time more effectively.                   | 1 | 2 | 3 | 4 | 5 | 6 | 7 |
| AP10 | I have learned a new skill or knowledge by myself.       | 1 | 2 | 3 | 4 | 5 | 6 | 7 |
| AP11 | I am able to analyze my strengths and weaknesses.        | 1 | 2 | 3 | 4 | 5 | 6 | 7 |
| AP12 | I have learned a new skill or knowledge by myself        | 1 | 2 | 3 | 4 | 5 | 6 | 7 |
| AP13 | I do my assignments independently.                       | 1 | 2 | 3 | 4 | 5 | 6 | 7 |
| AP14 | I exert more effort when I do difficult assignments.     | 1 | 2 | 3 | 4 | 5 | 6 | 7 |
| AP15 | I work hard to improve my grades when I got low grades.  | 1 | 2 | 3 | 4 | 5 | 6 | 7 |
| AP16 | I prepare tests and quizzes timely.                      | 1 | 2 | 3 | 4 | 5 | 6 | 7 |
| AP17 | I attend classes regularly.                              | 1 | 2 | 3 | 4 | 5 | 6 | 7 |
